# Supplementary material for: Genomic evidence for rediploidization and adaptive evolution following the whole-genome triplication
Source: PubMed Central journal article supplement (PMC10884412; doi:10.1038/s41467-024-46080-7), 2024-02-22
Supplement: 41467_2024_46080_MOESM3_ESM.pdf [file 41467_2024_46080_MOESM3_ESM.pdf]

## **Description of Additional Supplementary Files**

File Name: Supplementary Data 1

Description: Summary of karyotypes of typical mangrove species.

File Name: Supplementary Data 2

Description: The credits for the cartoon materials used in Fig. 3.

File Name: Supplementary Data 3

Description: Summary of GO categories enriched among differentially expressed gene pairs (DEGPs) in different tissues.

File Name: Supplementary Data 4

Description: Detailed annotation of three-copy retention groups related to root development and salt tolerance.

File Name: Supplementary Data 5

Description: Summary of whole genome sequences used in phylogenomic analysis in this study.
